# Supplementary material
Source: PubMed Central journal article supplement (PMC3567482)

## **Siderophore-mediated iron trafficking in humans is regulated by iron**

Zhuoming Liu<sup>1</sup>, Robert Lanford<sup>2</sup>, Sebastian Mueller<sup>3</sup>, Glenn S. Gerhard<sup>4</sup>, Sara Lusciati<sup>5</sup>, Mayka Sanchez<sup>5</sup>, and L. Devireddy<sup>1,\*</sup>

<sup>1</sup>Case Comprehensive Cancer Center and Department of Pathology, Case Western Reserve University, Cleveland, OH 44106, USA; <sup>2</sup>Texas Biomedical Research Institute, San Antonio, TX 78227, USA; <sup>3</sup>Center for Alcohol Research, University of Heidelberg, Heidelberg, Germany; <sup>4</sup>Geisinger Clinic, Weis Center for Research, Danville, PA, 17822. Cancer and Iron group, <sup>5</sup>Institute of Predictive and Personalized Medicine of Cancer (IMPPC), Cancer and Iron group, Crta Can Ruti, Camí de les Escoles s/n, 08916 Badalona, Barcelona, Spain.

\*Contact: lxd59@case.edu; Phone 216-368-1513; Fax 216-368-0494

Running title: Iron-dependent modulation of *human BDH2* mRNA

[Keywords: Mammalian siderophore; IRE-IRP regulation; hemochromatosis]

## Supplementary Figure legends

**Supplementary Figure 1. Immunoblot analysis of hBDH2 in naïve or DFO treated MCF-10 A cells.** Cell lysates were resolved on discontinuous polyacrylamide gels and blots were probed with anti-human BDH2 antibody, anti-Ferritin antibody (positive control), and anti-Actin antibody (loading control).

**Supplementary Figure 2. Mouse *bdh2* expression is not regulated by iron.** Mouse *Tfr1* and *bdh2* mRNAs were quantified by real time PCR analysis 16 hours post treatment in murine kidney cells (MIMCD) or pro-B lymphocytic cells (FL5.12). The value on y-axis was set at 1.0 for the mRNA levels in untreated cells. The relative mRNA levels in each sample were normalized to *actin* mRNA. Positive control includes *Tfr1*, whose expression is affected by iron. Results shown are the average means of three independent experiments with error bars depicting SD. Indicated *p* values in comparison with mock treatment.

**Supplementary Figure 3. *hBDH2* IRE confers iron-dependent regulation onto a heterologous reporter gene.** (A) Schematic diagram of the Luciferase reporter plasmids. (B) Secondary structures of wt and mutant *hBDH2* IREs. Mutated nucleotides are shaded. (C) MCF-10 A cells were transfected with Luciferase reporter plasmids shown in (A) for 5 hours and subsequently treated with 100  $\mu$ M each FAC or DFO overnight before harvesting for the determination of the Luciferase activity. Luciferase light units are normalized using the Renilla Luciferase activity to account for transfection efficiency. All experiments were performed in triplicate, and error bars represent the SD. Indicated *p* values were in comparison with mock treatment.

**Supplementary Figure 4. RNAi knockdown of IRPs.** (A) HeLa cells were initially transfected with an empty vector (control) or vectors expressing shRNAs specific for IRPs. G418 resistant clones were in turn transfected with a Dharmacon SMARTpool siRNAs specific for IRP-1 and IRP-2 or a scrambled siRNA oligomer (control). The mRNA levels of *IRPs* were assessed by qRT-PCR with gene-specific primers. The value on y-axis was set at 1.0 for the mRNA levels in control cells. The relative mRNA levels in each sample were normalized to *actin* mRNA. Results shown are the average means of three independent experiments with error bars depicting SD; \**p* < 0.05 in comparison with control cells. (B & C) Deficiency of IRPs leads to abrogation of iron-dependent

regulation of *hBDH2* mRNA. HeLa cells stably expressing shRNAs targeting IRP-1 or IRP-2 were in turn transfected with indicated siRNA oligomers to achieve a complete knock down of IRPs. *TfR1* and *hBDH2* mRNAs were quantified by real time PCR analysis 16 hours after Hemin or DFO treatment (100  $\mu$ M each). The value on y-axis was set at 1.0 for the mRNA levels in untreated cells. The relative mRNA levels in each sample were normalized to *actin* mRNA. Positive control includes *TfR1*, whose expression is affected by iron. Results shown are the average means of three independent experiments with error bars depicting SD.

**Supplementary Figure 5. Requirement of *hBDH2* IRE for iron-dependent regulation.** MCF-10 A cells stably expressing control shRNAs (**A & B**) or shRNAs targeting IRP-1 and-2 (**C & D**). IRP-1 or IRP-2 shRNA expressing cells were in turn transiently transfected with IRP-1 or IRP-2 siRNA pools to achieve complete knockdown of IRPs. Control cells or cells depleted of IRPs were treated with 100  $\mu$ M each of hemin or DFO overnight, and then Actinomycin D was at 5  $\mu$ g/ml added to inhibit the transcription. *hBDH2* and *TfR1* mRNAs were quantified by real time PCR analysis at indicated time points. The relative mRNA levels in each sample were normalized to *rlp13a* then plotted against time on a semi logarithmic graph. The first order decay slope was calculated using linear regression (Graph Pad Prism 5). The value on y-axis represents the percentage *hBDH2* or *TfR1* mRNA remaining relative to time point zero. Results shown are a representative of three independent experiments. (**E**) Murine FL5.12 cells were treated with 100  $\mu$ M each of hemin or DFO overnight, and then Actinomycin D was at 5  $\mu$ g/ml added to inhibit the transcription. *mbdh2* and *Tfr1* mRNAs were quantified by real time PCR analysis as described above. (**F**) Expression levels of IRP-1 and IRP-2 in MCF-10 A cells stably expressing control shRNAs or shRNAs as well as siRNA pools targeting IRP-1 and IRP-2 were analyzed by an immunoblot.

**Supplementary Figure 6. *hBDH2* IRE binds to IRPs *in vitro*.** (**A**) Radiolabeled RNA probes corresponding to IREs of *hBDH2* or *TfR1* *B IRE* were incubated with increasing amounts of purified recombinant IRP-1 or IRP-2. The RNA:protein complexes were resolved in a polyacrylamide gel and visualized by autoradiography. (**B**) The specificity of interaction between *hBDH2* IRE and IRPs was assessed using a radiolabeled *hBDH2* wt IRE

probe and an increasing molar excess unlabeled competitor WT, MT-1, MT-2, or TfR1 B IRE RNAs. F, indicates free RNA probe.

**Table S1. Sequences for RT-PCR Primers**

| RT-PCR primers | Sequence (5' to 3')            | Notes                            |
|----------------|--------------------------------|----------------------------------|
| <i>Luc2</i>    | TGCAAAAGATCCTCAACGTG           | Forward                          |
|                | AATGGGAAGTCACGAAGGTG           | Reverse                          |
| <i>hRluc</i>   | ACAAGTACCTCACCGCTTGG           | Forward                          |
|                | GACACTCTCAGCATGGACGA           | Reverse                          |
| <i>mbdh2</i>   | GTTGCTGGTTTTGTCCACCACGGAAC     | Forward                          |
|                | GTCTGTTTAGGAAAAGTTTTCAAGTGCCTC | Reverse                          |
| <i>mactb</i>   | TGTTACCAACTGGGACGACA           | Forward                          |
|                | GGGGTGTGTAAGGTCTCAAA           | Reverse                          |
| <i>mtfr1</i>   | GTTTCTGCCAGCCCCTTATTAT         | Forward                          |
|                | GCAAGGAAAGGATATGCAGCA          | Reverse                          |
| <i>hBDH2</i>   | ACCTGATGATCAAGGCATTC           | Forward                          |
|                | TCACAACCTCTTTGACGCTG           | Reverse                          |
| <i>hACTb</i>   | CAGCCATGTACGTTGCTATCCAGG       | Forward                          |
|                | AGGTCCAGACGCAGGATGGCATG        | Reverse                          |
| <i>hTfR1</i>   | AAAATCCGGTGTAGGCACAG           | Forward                          |
|                | CCTTTAAATGCAGGGACGAA           | Reverse                          |
| <i>18srRNA</i> | CGGCTACCACATCCAAGGAA           | Forward                          |
|                | GCTGGAATTACCGCGGCT             | Reverse                          |
| <i>rlp13a</i>  | CTCAAGGTCGTGCGTCTG             | Forward                          |
|                | TGGCTTTCTCTTTCCTCTTCTC         | Reverse                          |
| <i>EIF2b2</i>  | TCAAGATTATCCGGGAGGAG           | Forward                          |
|                | ATGGAAGCTGAAATCCTCGT           | Reverse                          |
| <i>pbdh2-1</i> | ACCTGATGATCAAGGCATTC           | Forward for Rhesus and Baboon    |
|                | TCACAACCTCTTTGATGCTG           | Reverse                          |
| <i>pbdh2-2</i> | ACCTGATGATCAAGGCATTC           | Forward for Tamarin and Marmoset |
|                | TCACAACCTCTTTAATGCTG           | Reverse                          |
| <i>ptfr1-1</i> | AAAATCCAGTGTGGGGACAG           | Forward for Rhesus and Baboon    |
|                | CCTTTAAATGCAAGGATGAA           | Reverse                          |
| <i>ptfr1-2</i> | AAAGTCCAGTGTCGGAACAG           | Forward for Tamarin and Marmoset |
|                | CCTTTAAATGCAAGGACGAA           | Reverse                          |
|                |                                |                                  |

**Table S2. Hemochromatosis samples described in Figs 1 A and B\***

| Order | Age | Gender | Genotype     | Iron | IBC | TF saturation (%) | Ferritin $\mu\text{g/L}$ |
|-------|-----|--------|--------------|------|-----|-------------------|--------------------------|
| 1     | 52  | Female | C282 Het     | 153  | 264 | 58                | 56.7                     |
| 2     | 52  | "      | "            | 132  | 337 | 39                | 51.1                     |
| 3     | 65  | "      | "            | 78   | 315 | 25                | 30.3                     |
| 4     | 55  | Male   | "            | 69   | 307 | 22                | 123.5                    |
| 5     | 47  | Female | "            | 134  | 308 | 44                | 60.6                     |
| 6     | 69  | Male   | "            | 86   | 245 | 35                | 169.4                    |
| 7     | 32  | Female | "            | 88   | 333 | 26                | 107.9                    |
| 8     | 54  | "      | "            | 116  | 311 | 37                | 158.5                    |
| 9     | 54  | "      | "            | N/D  | N/D | 34.7              | 1048                     |
| 10    | 35  | Male   | C282Y Homo   | 106  | 284 | 37                | 499.7                    |
| 11    | 40  | "      | "            | 106  | 349 | 30                | 111.9                    |
| 12    | 33  | Female | "            | 70   | 406 | 17                | 52.4                     |
| 13    | 40  | "      | "            | 88   | 282 | 31                | 77.4                     |
| 14    | 43  | "      | "            | 145  | 379 | 38                | 108                      |
| 15    | 39  | "      | "            | 69   | 379 | 18                | 88.9                     |
| 16    | 57  | "      | "            | 51   | 269 | 19                | 261.6                    |
| 17    | 54  | Male   | "            | N/D  | N/D | 99.7              | 1234                     |
| 18    | 53  | Female | Compound Het | 88   | 255 | 35                | 51.7                     |
| 19    | 27  | "      | "            | 51   | 344 | 15                | 65.3                     |
| 20    | 35  | "      | "            | 51   | 324 | 16                | 84.6                     |
| 21    | 41  | "      | "            | 41   | 370 | 11                | 51.4                     |
| 22    | 33  | "      | "            | 59   | 366 | 16                | 26.4                     |
| 23    | 41  | "      | "            | 67   | 309 | 22                | 260.1                    |
| 24    | 29  | "      | "            | 75   | 395 | 19                | 18.9                     |
| 25    | 53  | Male   | "            | N/D  | N/D | N/D               | 724                      |
| 26    | 57  | Female | H63D Het     | 60   | 356 | 17                | 104.5                    |
| 27    | 35  | "      | "            | N/D  | N/D | N/D               | 33.2                     |
| 28    | 42  | Male   | "            | 113  | 266 | 42                | 220.1                    |
| 29    | 55  | Female | "            | 46   | 349 | 13                | 34.4                     |
| 30    | 61  | "      | "            | 40   | 303 | 13                | 55.7                     |
| 31    | 43  | "      | "            | 75   | 281 | 27                | 88.4                     |
| 32    | 54  | "      | "            | 43   | 319 | 13                | 43.9                     |
| 33    | 41  | Male   | "            | 93   | 394 | 24                | 102.9                    |
| 34    | 35  | Female | "            | 74   | 331 | 22                | 74.1                     |
| 35    | 47  | "      | "            | 57   | 412 | 14                | 13.7                     |
| 36    | 72  | "      | Normal       | 85   | 384 | 22                | 73.5                     |
| 37    | 41  | "      | "            | 49   | 337 | 15                | 49.3                     |
| 38    | 48  | "      | "            | 71   | 343 | 21                | 41                       |
| 39    | 46  | "      | "            | 76   | 273 | 28                | 52.3                     |
| 40    | 44  | "      | "            | 85   | 357 | 24                | 16.2                     |

\*RNA was extracted from flash frozen biopsies from normal and HH livers. Iron is serum iron level. IBC, iron binding capacity.

**Table S3. Hemochromatosis samples described in Fig 1 C\***

| Order | Age | Gender | Genotype  | Hepatic Iron index | Iron | TF saturation (%) | Ferritin $\mu\text{g/L}$ |
|-------|-----|--------|-----------|--------------------|------|-------------------|--------------------------|
| 1     | 50  | Male   | C282 Homo | 5.35               | 151  | 97                | 3425                     |
| 2     | 66  | Female | "         | 4.32               | 194  | 84                | 574                      |
| 3     | 51  | Male   | "         | 4.66               | N/D  | 90                | 1030.3                   |
| 4     | 38  | "      | C282Y Het | 2.35               | N/D  | 74                | 423.5                    |
| 5     | 42  | "      | "         | 2.1                | 98   | 74                | 460.6                    |
| 6     | 59  | Male   | Normal    | 1.2                | 85   | 25                | 109.2                    |
| 7     | 42  | Female | "         | 1                  | 39   | 26                | 89.9                     |
| 8     | 54  | "      | "         | 1.3                | 51   | 27                | 58.5                     |
| 9     | 44  | Male   | "         | 1.12               | N/D  | 24.7              | 108.8                    |

\*Specimens were obtained from liver biopsies in case of normal and for HH sections were obtained from liver explants. Iron is serum iron level.

**Table S4. Relative levels of *hBDH2* and *TfR1* in microarray analysis of hemochromatosis samples\***

| Probe               | Normal1 | Normal2 | Normal3 | HH1   | HH2   | HH3   |
|---------------------|---------|---------|---------|-------|-------|-------|
| <i>hBDH2</i>        | 0.97    | 0.17    | 0.66    | -0.55 | -0.67 | -0.82 |
| <i>TfR1</i> probe 1 | 2.01    | 0.62    | 1.09    | 1.26  | 1.17  | 0.54  |
| <i>TfR1</i> probe 2 | 0.36    | 0.02    | 0.24    | -0.19 | -0.66 | 0.28  |
| <i>TfR1</i> probe 3 | -0.96   | -0.60   | -1.76   | -0.80 | -0.95 | -0.32 |

\*Microarray data was obtained from ref. 39.

Supplementary Figure 1

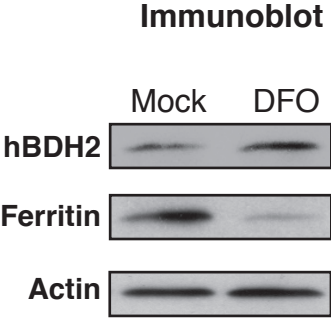

Supplementary Figure 2

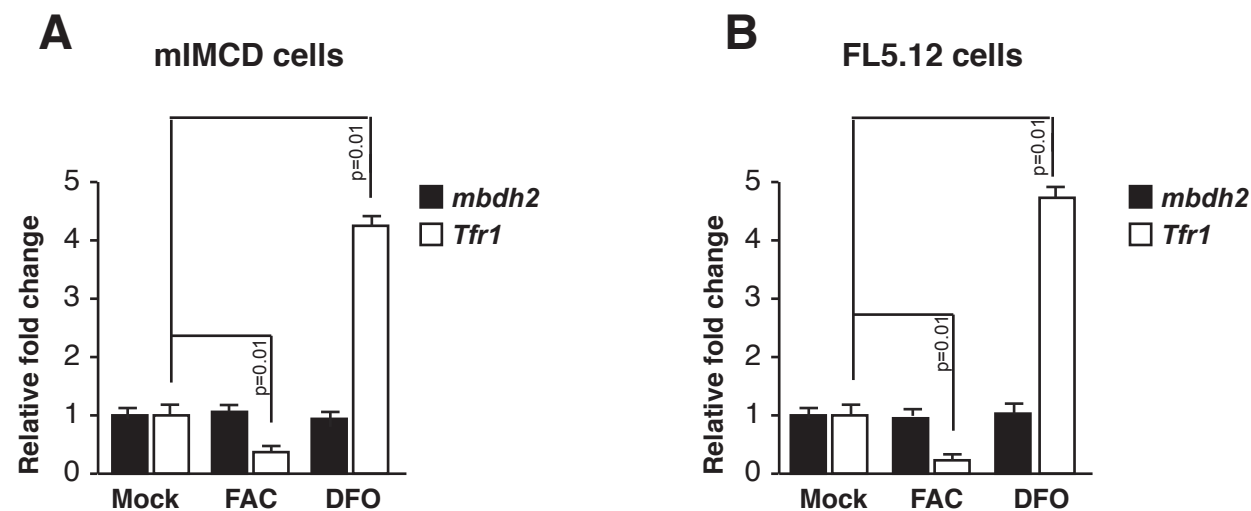

Supplementary Figure 3

A

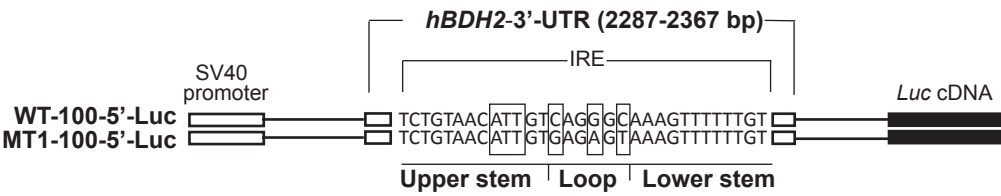

B

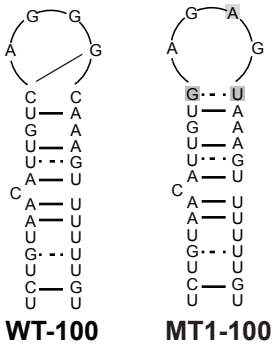

C

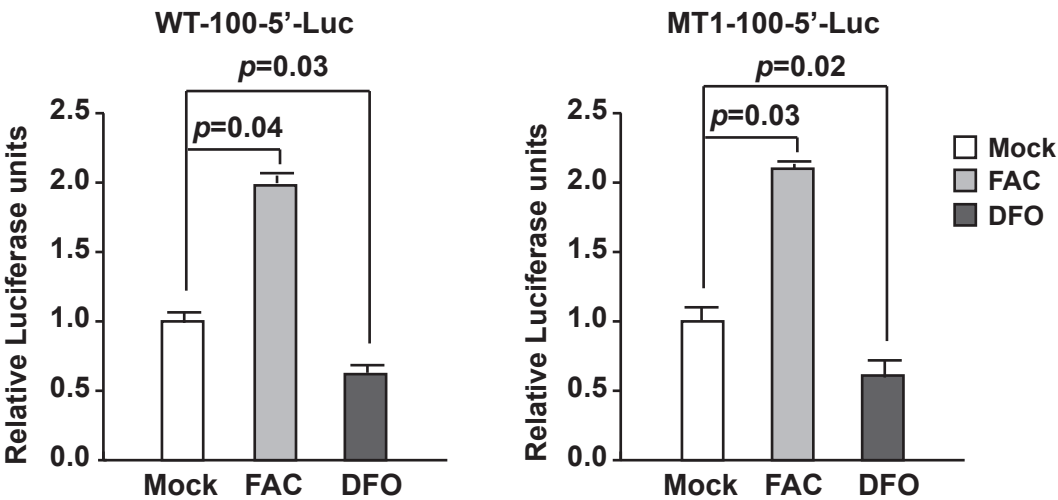

# Supplementary Figure 4

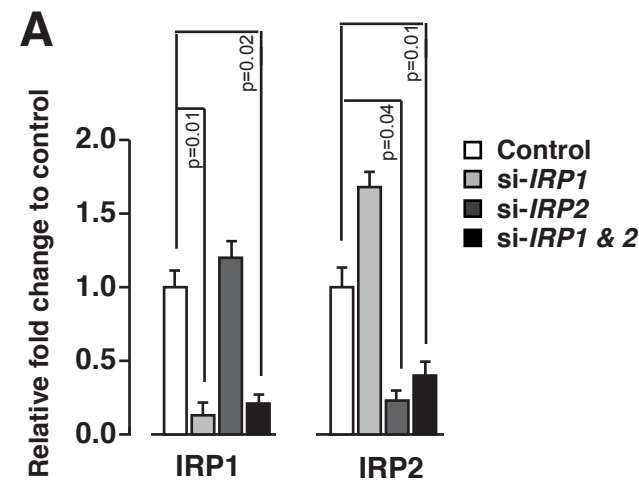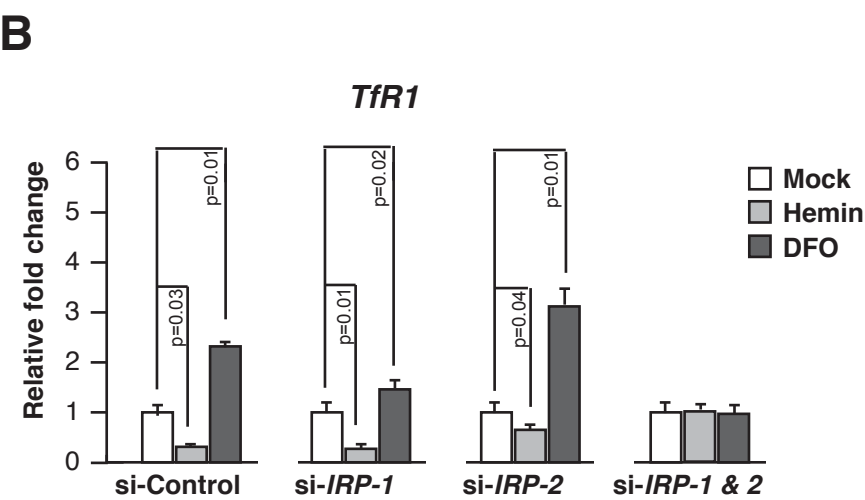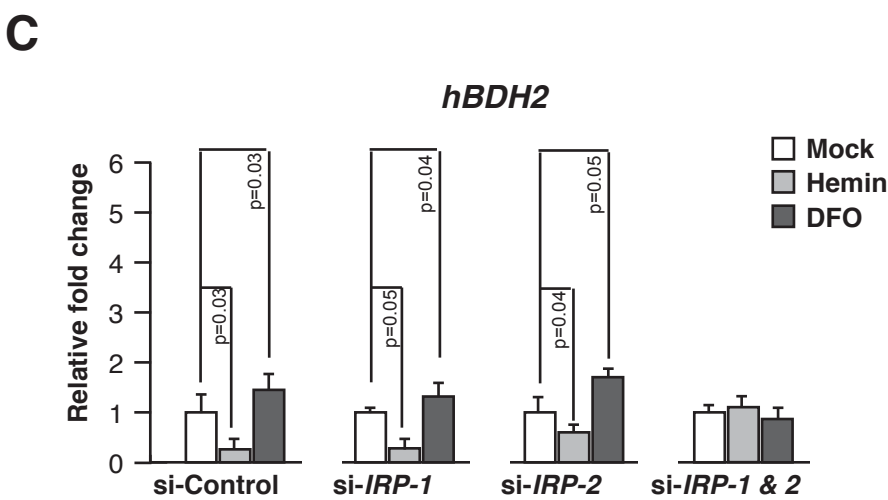

Supplementary Figure 5

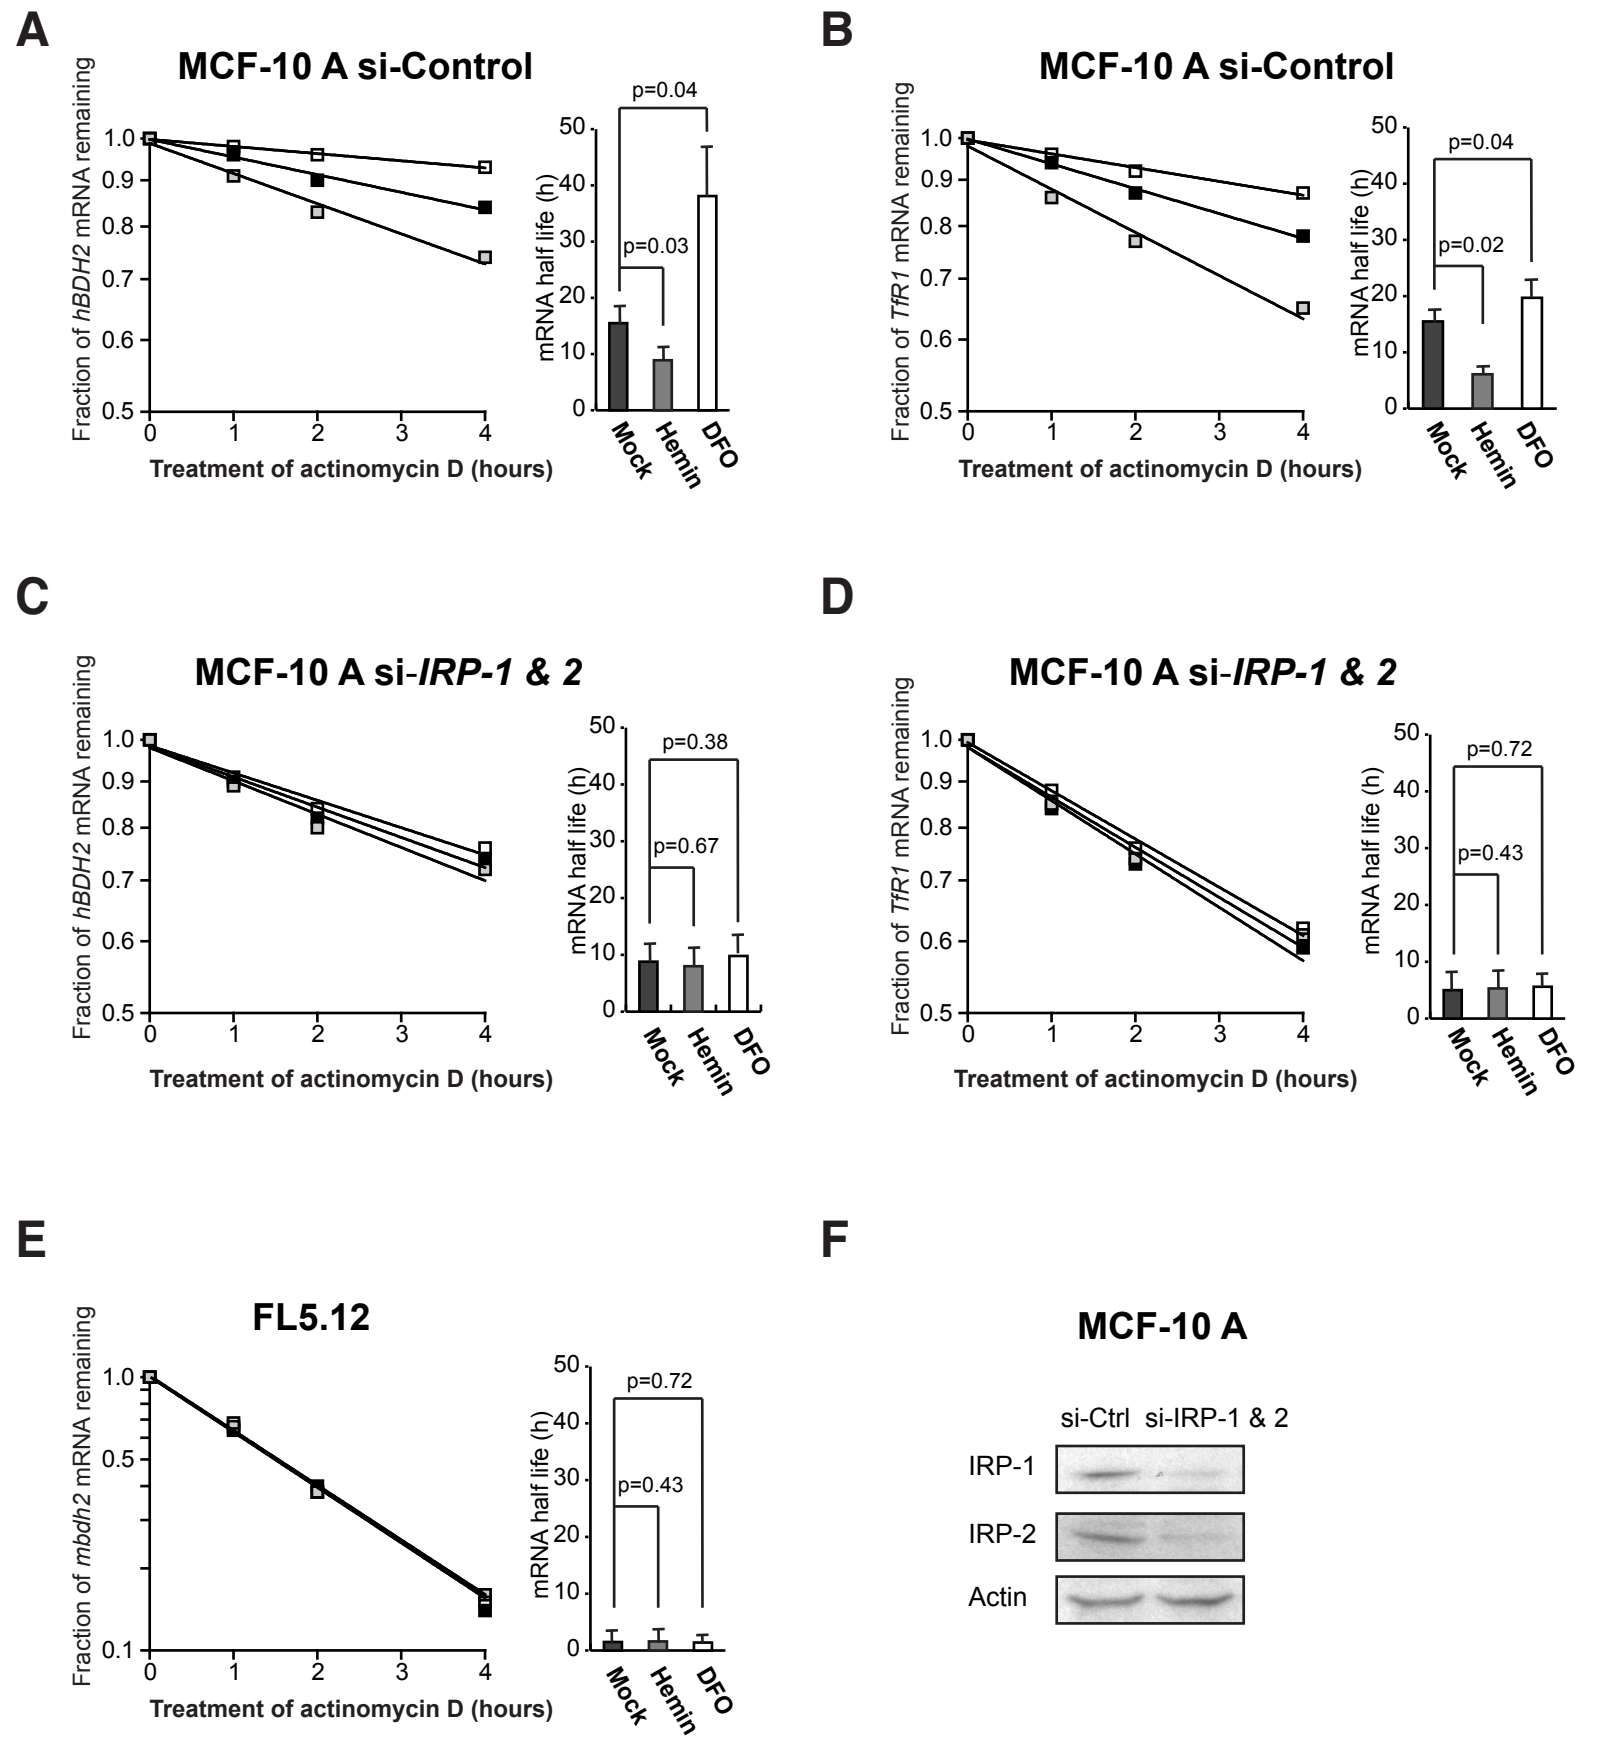

Supplementary Figure 6

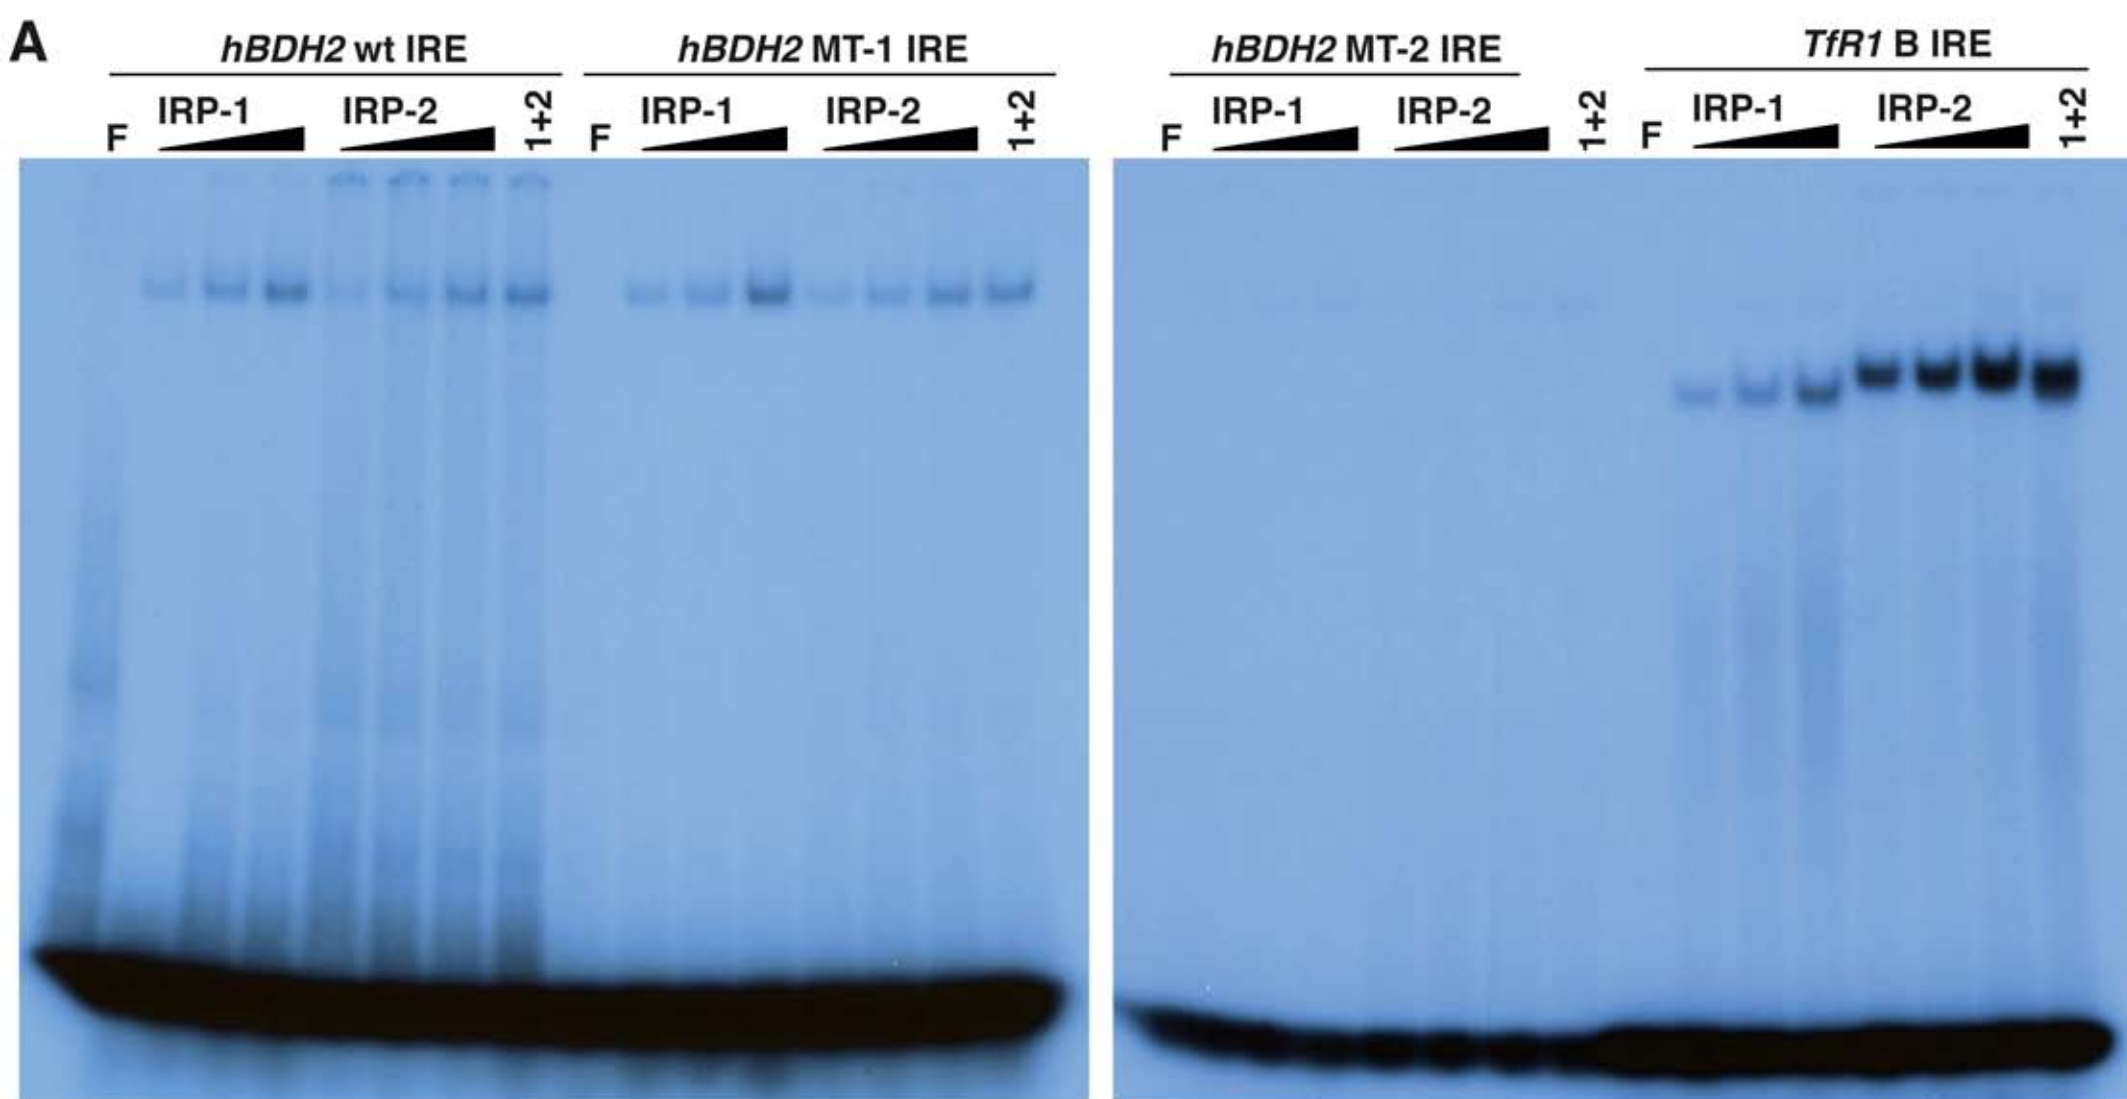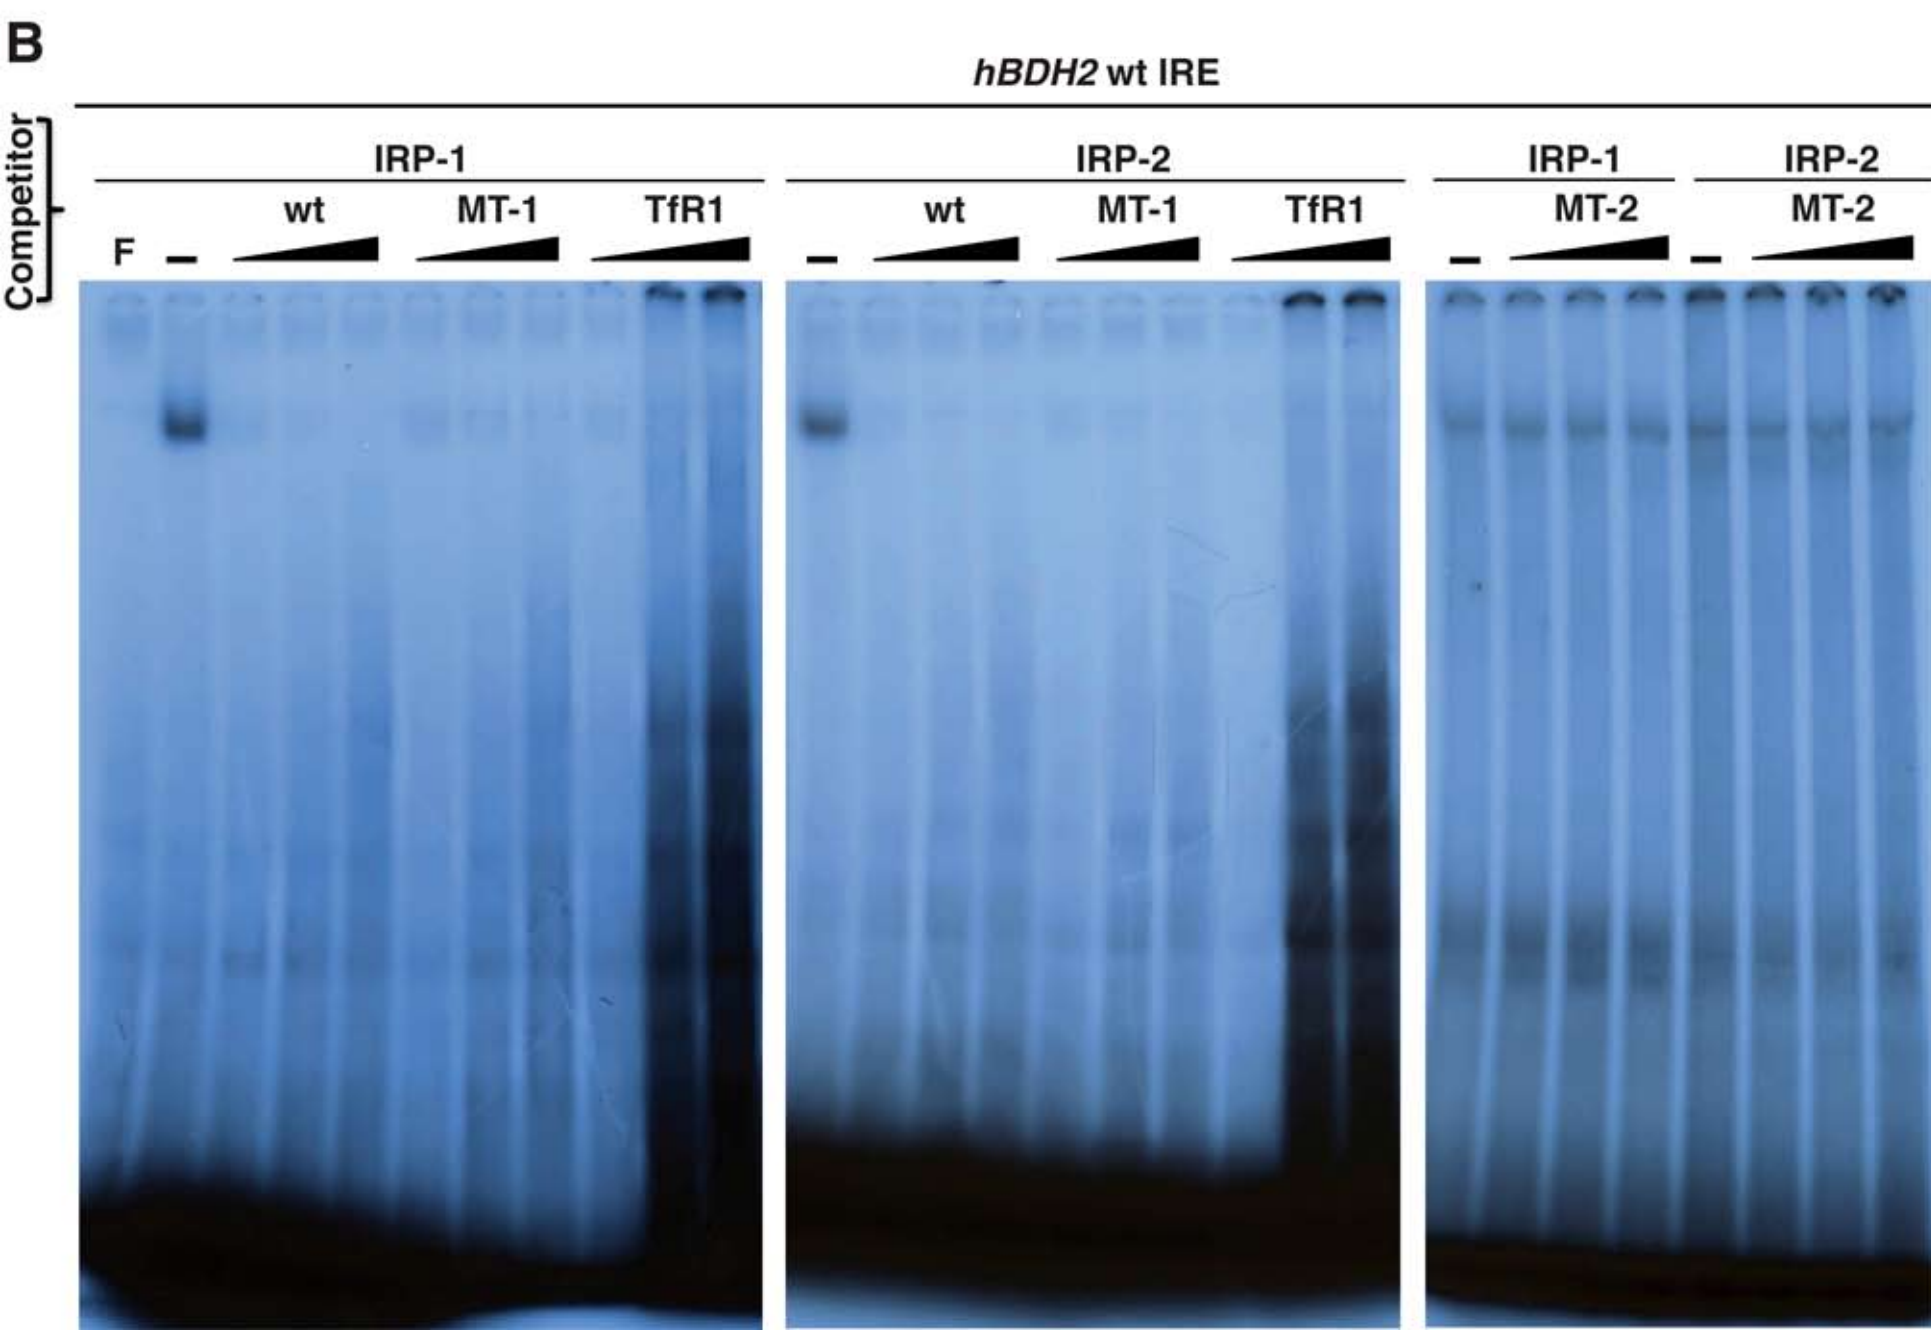

Supplement: NIHMS439306-supplement-Supplementary_data.pdf [file NIHMS439306-supplement-Supplementary_data.pdf]
