# Supplementary material
Source: PubMed Central journal article supplement (PMC3567482)

# Supplementary Figure 1

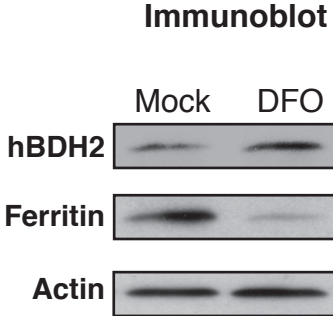

Supplement: NIHMS439306-supplement-Supp_Fig_1.pdf [file NIHMS439306-supplement-Supp_Fig_1.pdf]

# Supplementary Figure 2

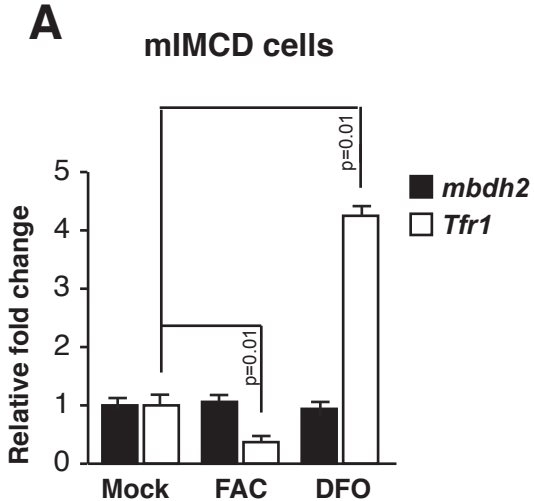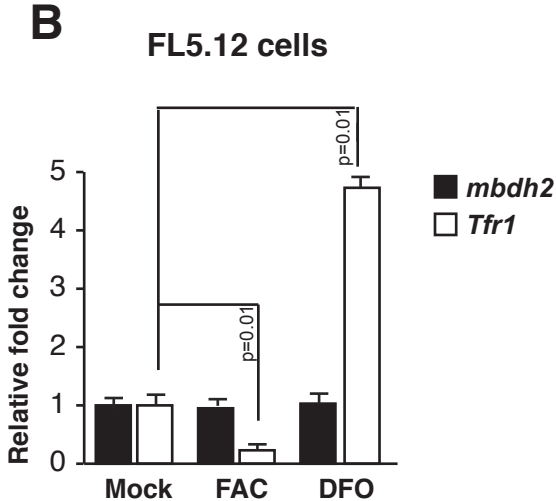

Supplement: NIHMS439306-supplement-Supp_Fig_2.pdf [file NIHMS439306-supplement-Supp_Fig_2.pdf]

# Supplementary Figure 3

**A**

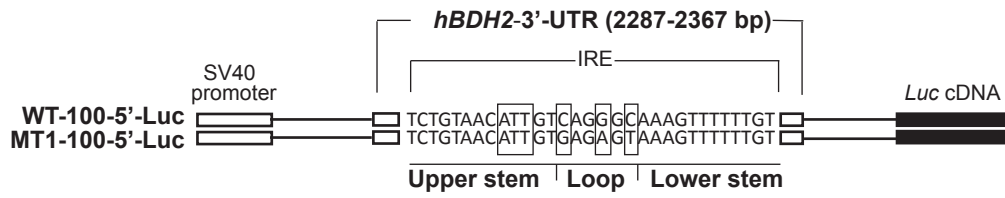

**B**

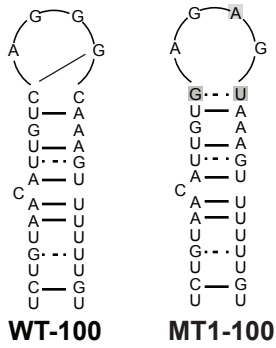

**C**

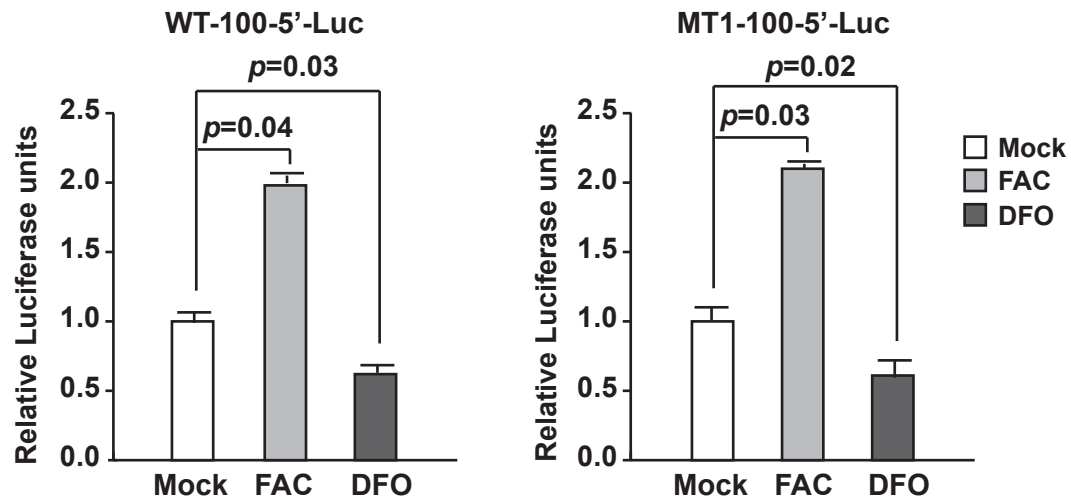

Supplement: NIHMS439306-supplement-Supp_Fig_3.pdf [file NIHMS439306-supplement-Supp_Fig_3.pdf]

# Supplementary Figure 4

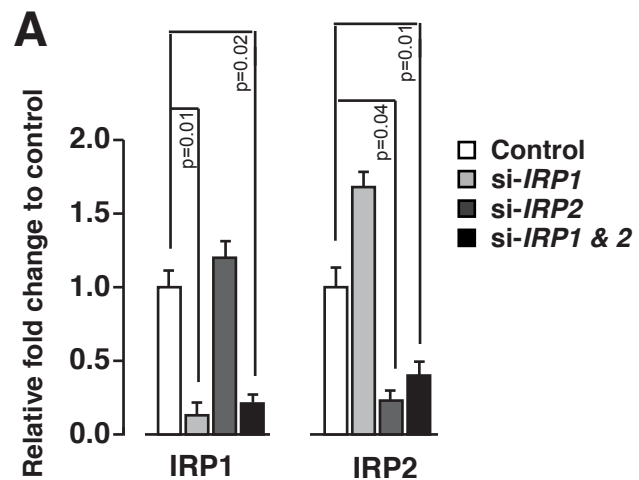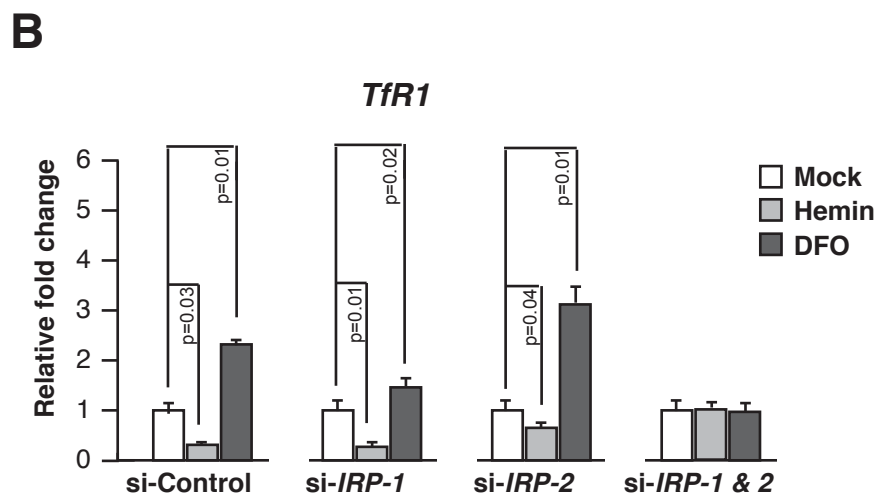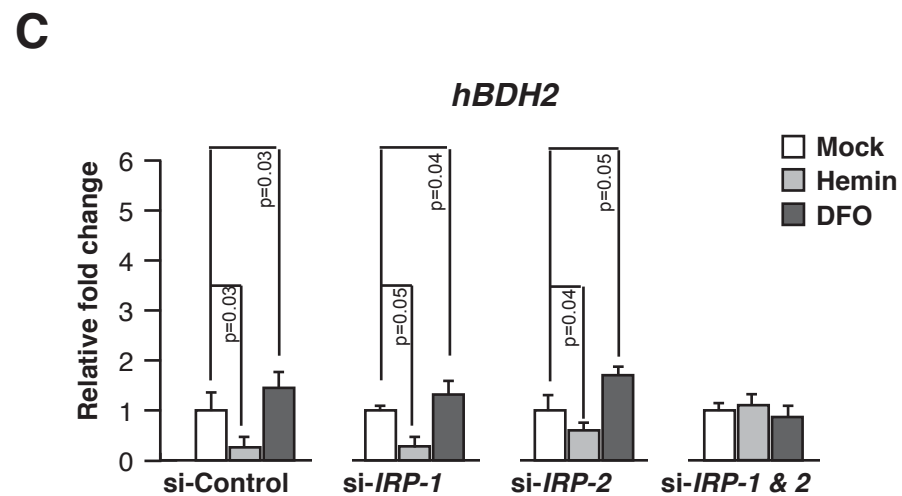

Supplement: NIHMS439306-supplement-Supp_Fig_4.pdf [file NIHMS439306-supplement-Supp_Fig_4.pdf]

**Supplementary Figure 5**

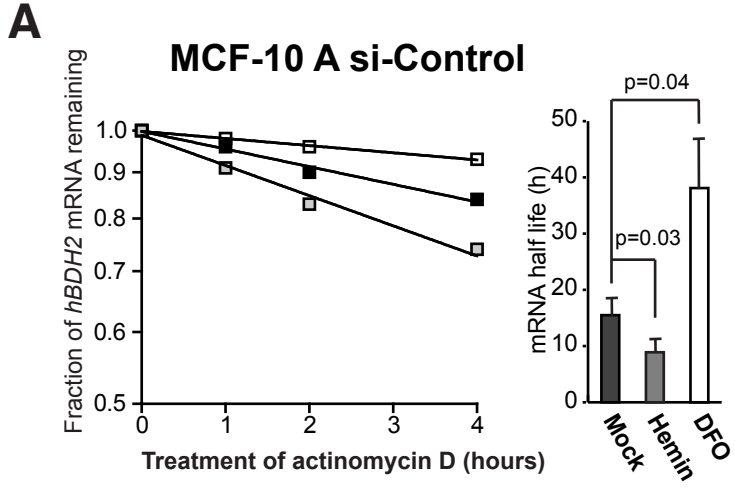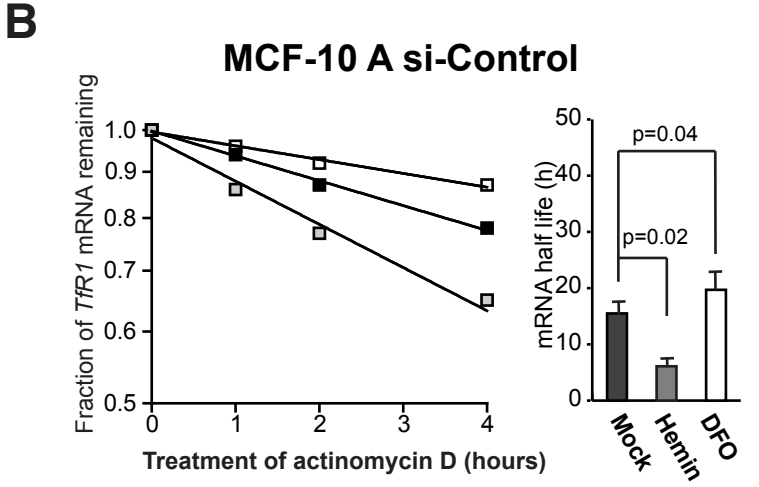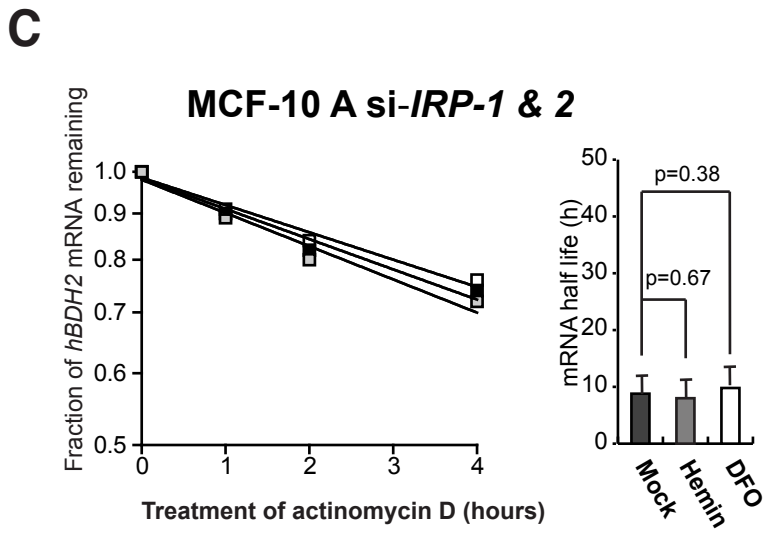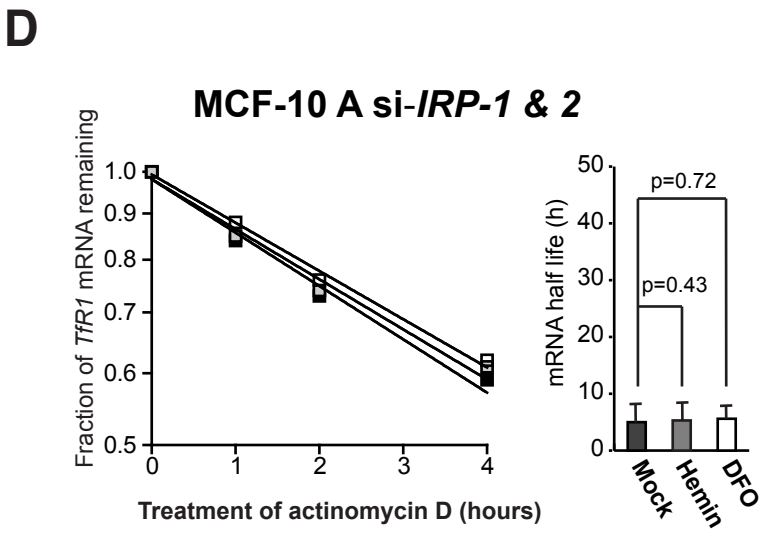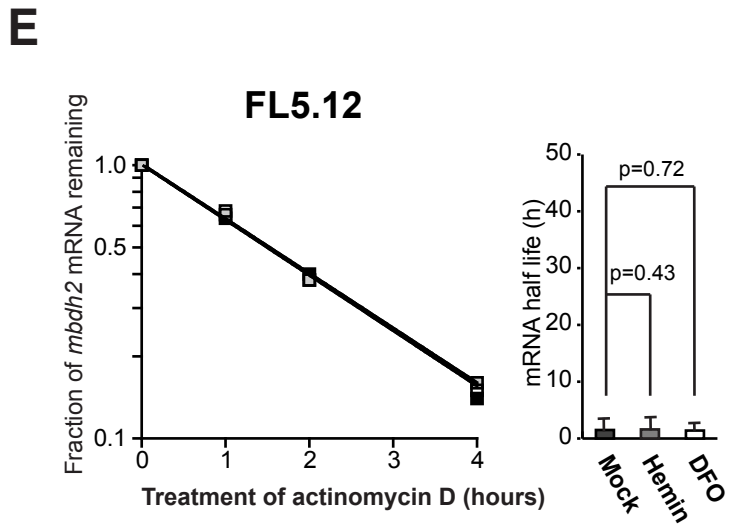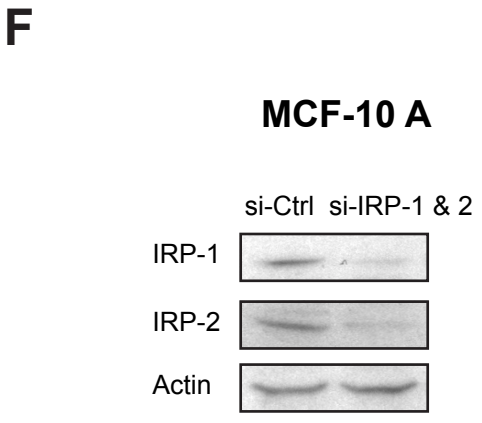

Supplement: NIHMS439306-supplement-Supp_Fig_5.pdf [file NIHMS439306-supplement-Supp_Fig_5.pdf]

Supplementary Figure 6

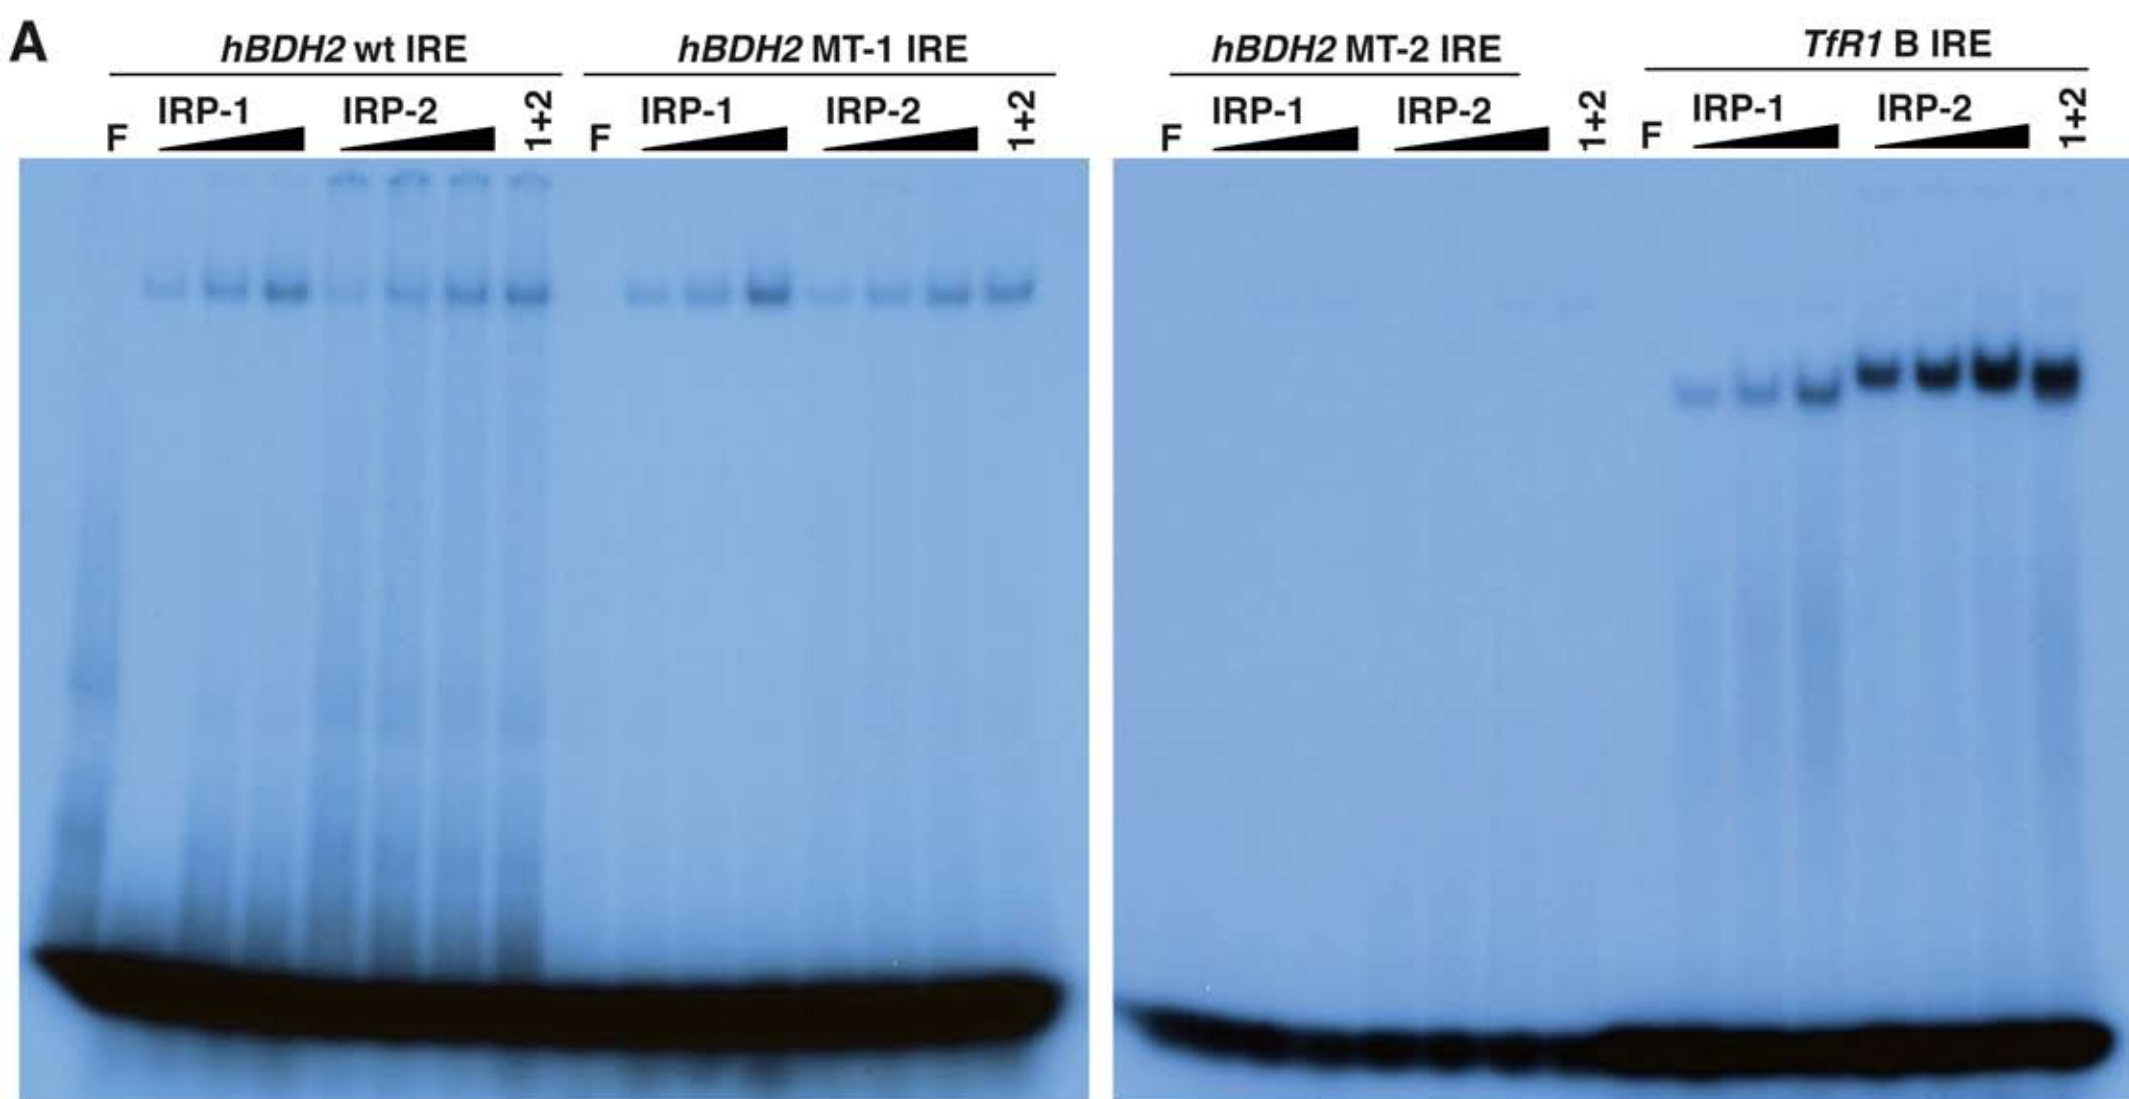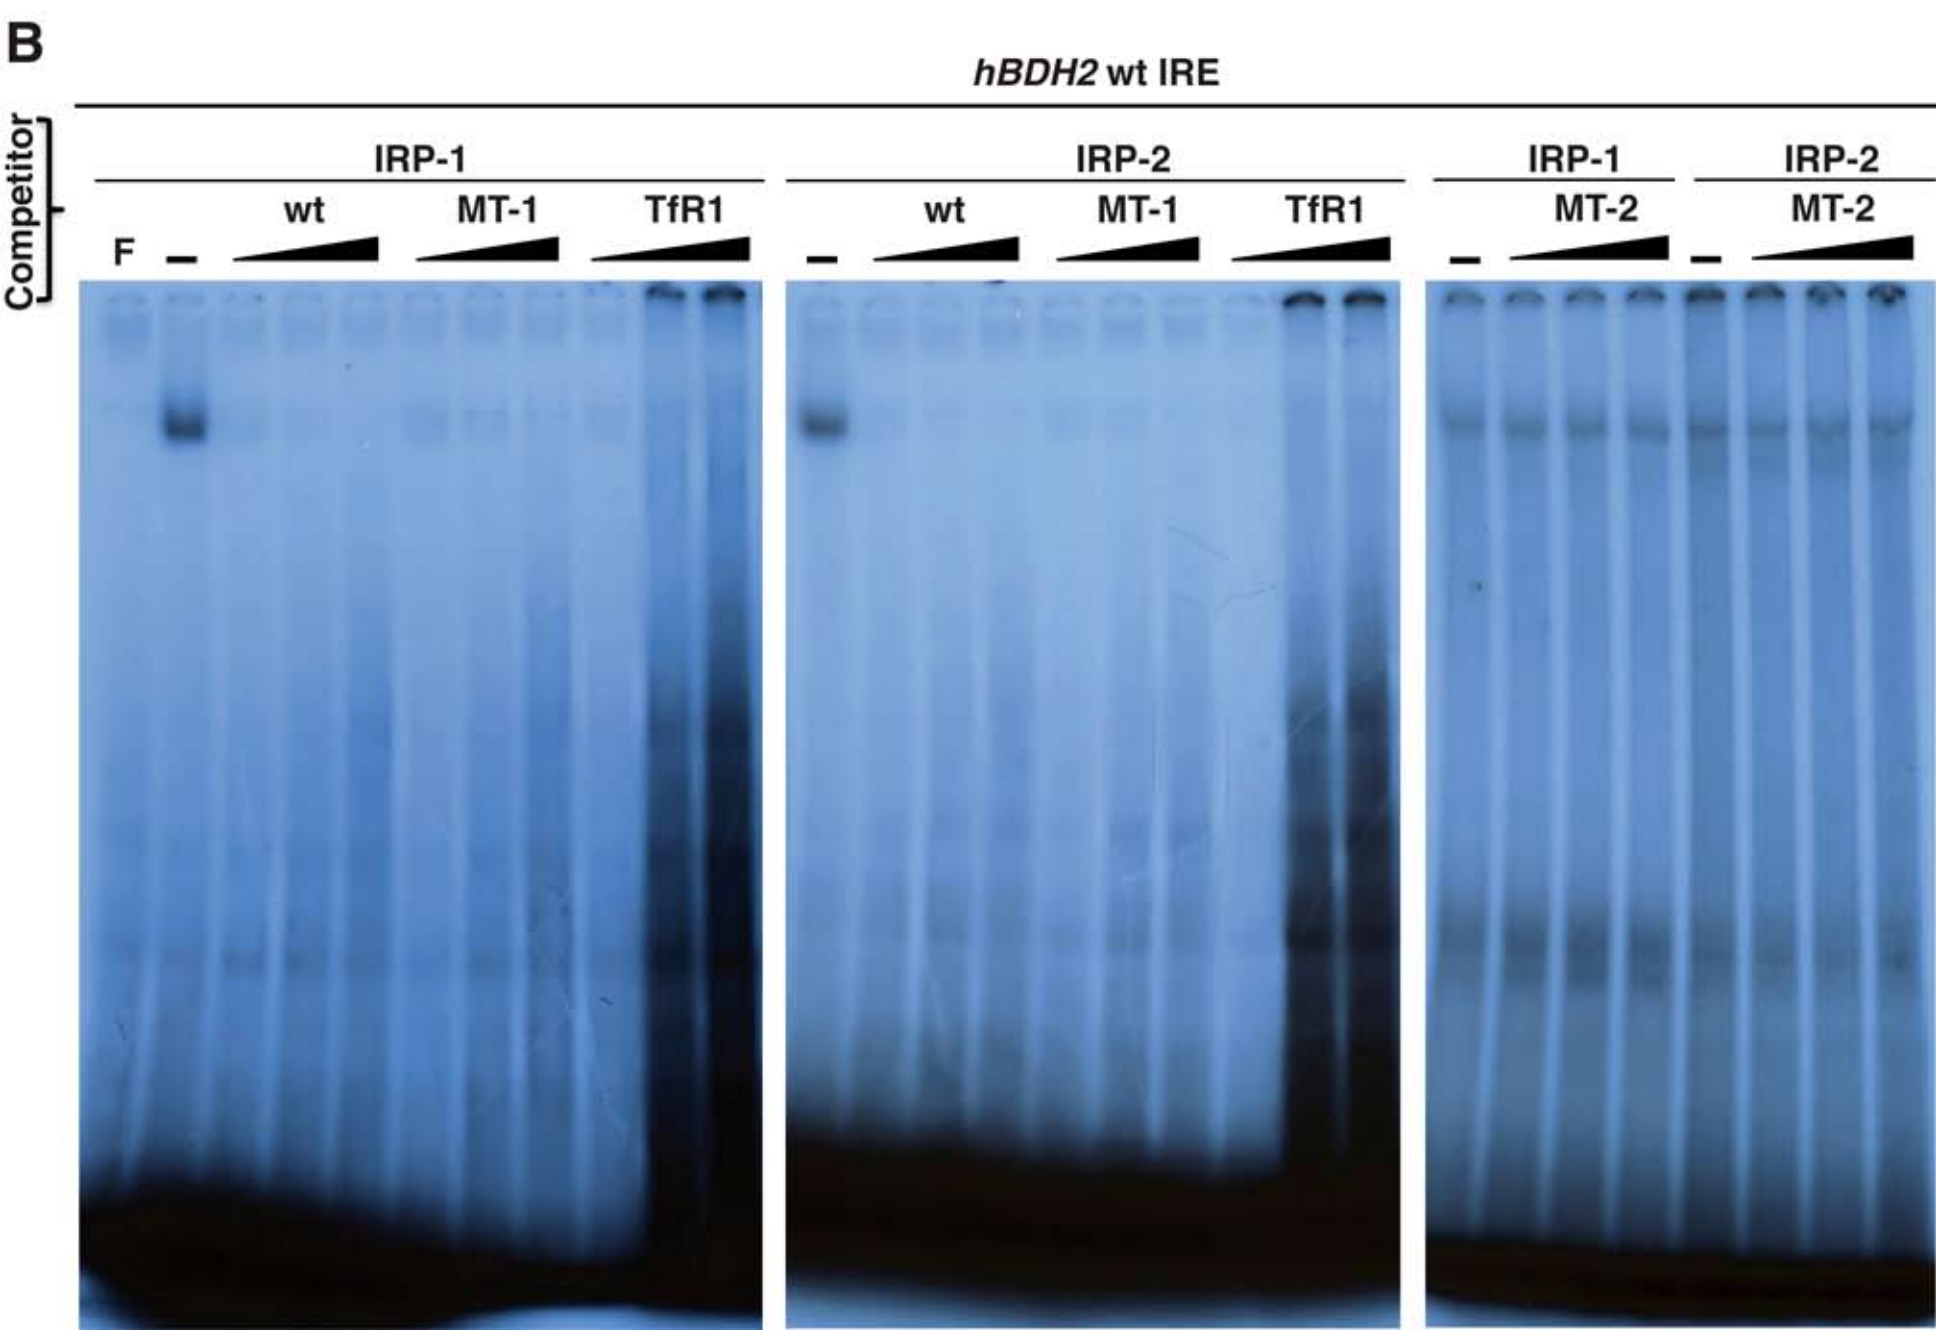

Supplement: NIHMS439306-supplement-Supp_Fig_6.pdf [file NIHMS439306-supplement-Supp_Fig_6.pdf]
